# Supplementary material for: Regulation of Fruit Growth in a Peach Slow Ripening Phenotype
Source: MDPI journal article supplement (doi:10.3390/genes12040482), 2021-03-26

**Figure S1**

**Expression pattern of peach ortholog of NAC (Prupe.4G186800) gene throughout the whole fruit development in the mesocarp of cv Fantasia and Slow Ripening fruit**

Real time qPCR expression analysis of peach ortholog of NAC (Prupe.4G186800) gene throughout fruit development in the mesocarp of cv FAN (square, dashed line) and SR (circle, continuous line) (for details see Methods). Developmental stages (S1, S2, S3, and S4) are indicated at the top of each chart, taking FAN as a reference. Highly significant differences as determined by Student's T test are indicated with two ( $P \leq 0.01$ ) asterisks, respectively. MNE: Mean normalized expression, DAFB: Days After Full Bloom. Bars represent standard deviation ( $n=3$ ).

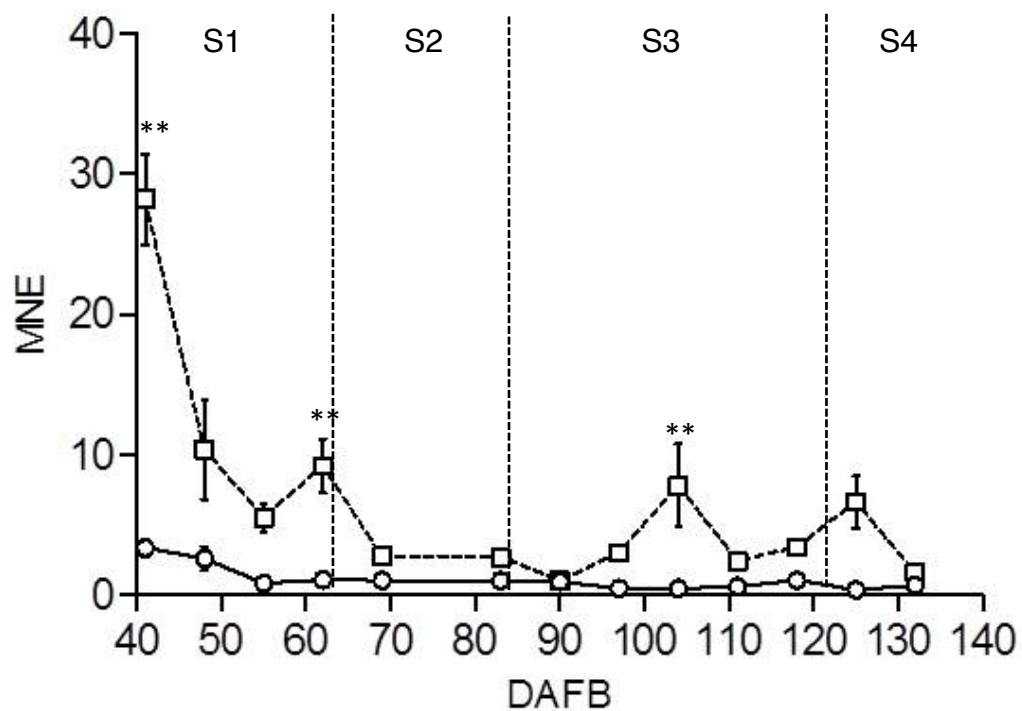

**Figure S2. Ploidy distribution in mesocarp cells of FAN (up) and SR (down) fruits.**

The frequency data of each C-value class derive from 15 fruits at different developmental stages. Developmental stages (S1, S2, S3, and S4) are indicated at the top of each chart, taking FAN as a reference. DAFB, Days After Full Bloom. PH, pit hardening.

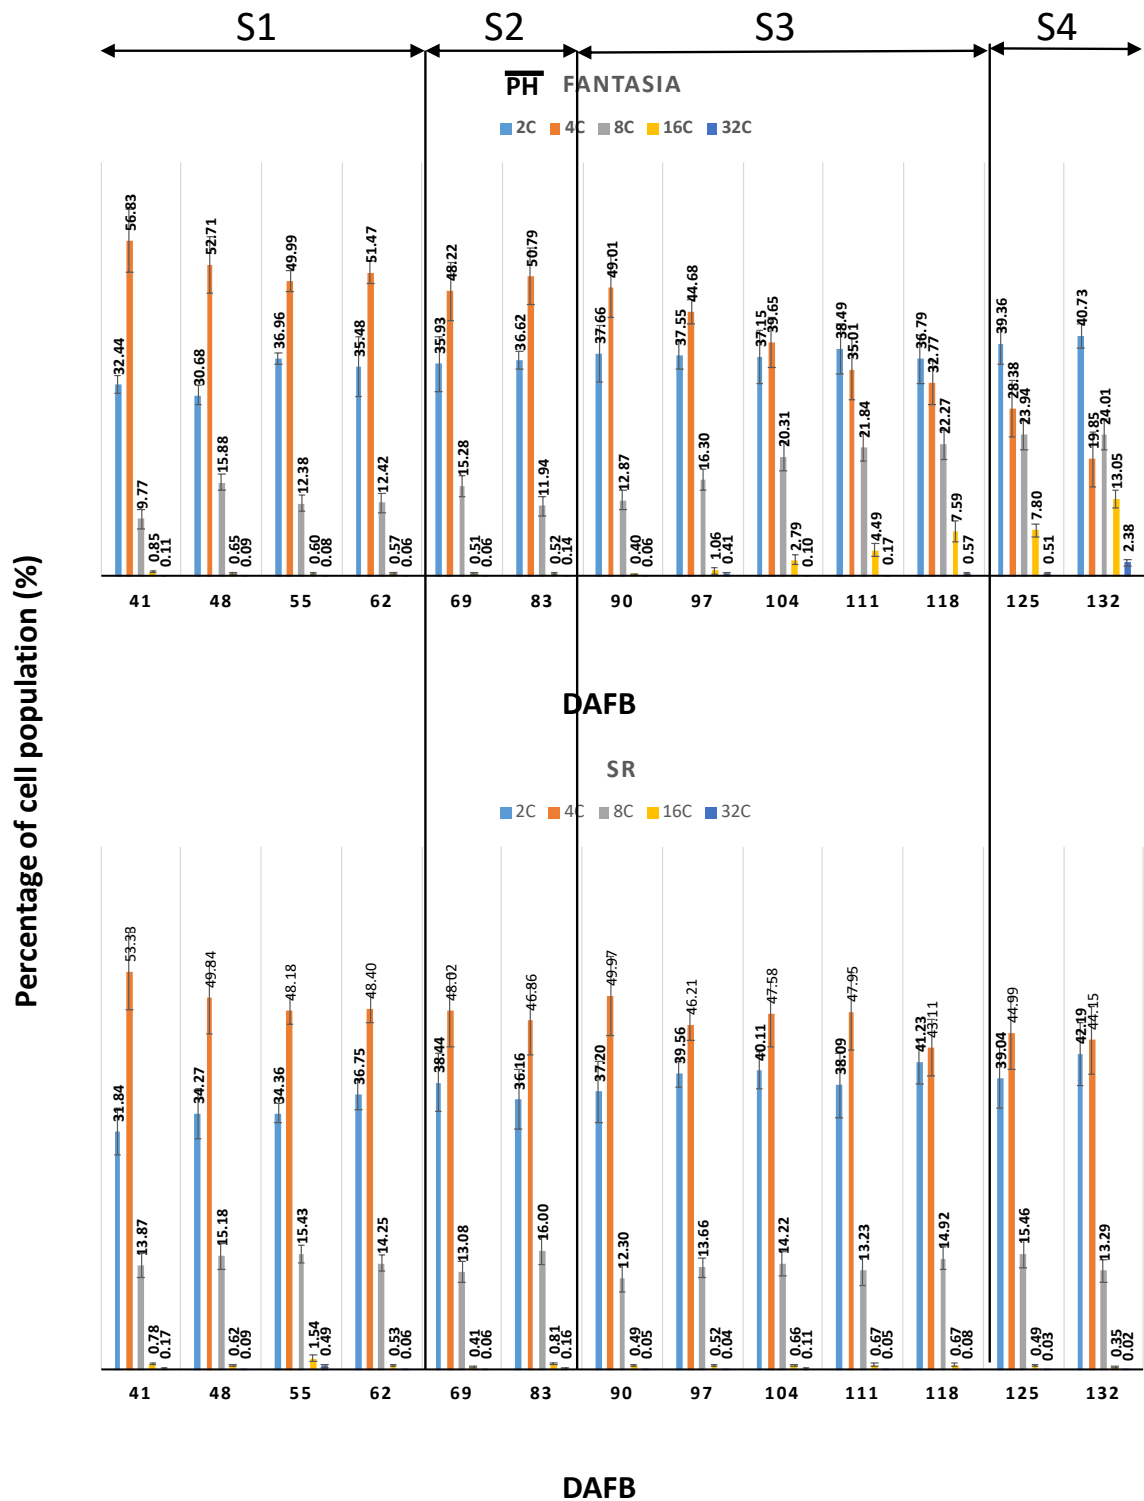

Supplement: s1 [file s1]
