# Supplementary material for: Regulation of Fruit Growth in a Peach Slow Ripening Phenotype
Source: MDPI journal article supplement (doi:10.3390/genes12040482), 2021-03-26
Supplement: s1 [file s1]

**Table S1: Primers RT-PCR and ChIP analyses**

Primer sequences used for expression and ChIP analyses. Oligonucleotides were designed, for expression RT-PCR, on primary transcript corresponding to target gene sequences, including the housekeeping genes, and close to annotated genomic TSS (from <http://phytozome.jgi.doe.gov>) for single loci for the ChIP investigation. All the sequences are reported in a 5'-3' orientation, grouped according to main categories.

| qPCR analyses                    |           |                                                               | ChIP analyses                                                              |                                                              |
|----------------------------------|-----------|---------------------------------------------------------------|----------------------------------------------------------------------------|--------------------------------------------------------------|
| <i>P. persica</i> ID             | TAIR      | Primer sequence 5'>3'                                         | Primer sequence 5'>3'                                                      | ChIP Primers coordinates compared to TSS                     |
| Target genes                     |           |                                                               |                                                                            |                                                              |
| Prupe.3G075200_CYCA2/3 related   | CYCA2;3   | Fw: AGGCTGTGCGAACAAATCCA<br>Rev: CAGCAAGCATTTGGTCACATCC       | Fw: AACATCTTGAAATGAGCCCACTTCGACATG<br>Rev: GTCCCAAATAATCTTTCTGAGCAAACCTCCC | TSS +612bp (Fw) +779bp (Rev) (5'UTR)                         |
| Prupe.1G428100_CYCA related      | CYCA3;1   | Fw: CCAAAGCCAAAGGCGAAGAAA<br>Rev: AATCATAAATGTCACGAGCATAAGG   | Fw: GAAGCAATTCAAAGCAGGGAACCAAAATGG<br>Rev: CCCTAGCGAATCTGTGAGTGTGAGAGG     | -56bp (Fw) TSS +137 (Rev) (5'UTR)                            |
| Prupe.2G084600_CDKA-type         | CDK2      | Fw: CGTGGTTTACAAGGCTCGTG<br>Rev: GCCTGACAATGTTGCCATGTT        | Fw: GCTGGATGTACCCGCTGGAGCTG<br>Rev: CTGTACACAAACAGTACCTGACCGC              | -47bp (Fw) TSS +185 bp (Rev) (5'UTR)                         |
| Prupe.6G299900_CDKB-type         | CDKB1     | Fw: CCTCGACACCGATCTCAAGAA<br>Rev: CCCTTGACAGTTGGTAGAGGA       | Fw: GACATTGATGTACCATTATTACGTTGC<br>Rev: CGTGTCCCGCGCTTGCCCTCACG            | -104 bp (Fw) TSS +200bp (Rev) (5'UTR)                        |
| Prupe.1G006300_CKI               | KRP3      | Fw: CATCGCTTACCTGTCAACC<br>Rev: GCCTCGAAGTCGCCCTAGAA          | Fw: GGCTCTAGAGGCTGCCACTTACTAC<br>Rev: CCTCATGTACTTGCCCATTTCTTGCTC          | -9bp TSS +16bp (Fw) +242bp (Rev) (5'UTR and coding sequence) |
| Prupe.8G256300_WEE1-like protein | WEE1      | Fw: GCTTGCTGACTTTGGATGTGC<br>Rev: TGGCAACTCCCAAGGAGAAGA       | Fw: CTGCTCTGATGTGATTTATGCCC<br>Rev: GACAATTGGTGGCTTTCACCTAGC               | -0 (Fw) TSS +221 bp (Rev) (coding sequence)                  |
| Prupe.5G131900_NST1              | NST1      | Fw: ACGGCCAGTCTCAAGTTCCTCCG<br>Rev: CGAATACATCAAGATCAATCCTCTC | Fw: GTGGTTGGCTCTTCTCAAGGGATGG<br>Rev: CGGTGAGAGAATGGAATTGAAGGAGCTAG        | -86bp (Fw) TSS +108 bp (Rev) (coding sequence)               |
| Prupe.5G117500_CABP-like         | CABP-like | Fw: CCCGCGACCGCCATACTCTTAC<br>Rev: TCAACGGAACGGACTCGCTGTG     | Fw: CACCACCAACCGCTCATCTTCTCC<br>Rev: CGTTGGTTTCTTCTCGGGTAGATCGG            | -15 bp TSS +9bp (Fw) +122bp (Rev) (coding sequence)          |
| Prupe.8G232200_Aux/IAA           | AUX_IAA   | Fw: CCAAGACCAACAAGGACAACA<br>Rev: CATGCTCACCTTCACCA           | Fw: TGTCCAGAGAGTGCAGTGTCCACG<br>Rev: GGGCTGCGTCGGTATTAATATGCG              | -24 bp (Fw) TSS +168 bp (Rev) (5'UTR)                        |
| Prupe.4G186800_NAC               | NAC       | Fw: CGAACCTTCACGCAAAATGGCAGCT<br>Rev: CGGTCGTCAATATCCGGGAGC   |                                                                            |                                                              |
| Housekeeping genes:              |           |                                                               |                                                                            |                                                              |
| Prupe.1G364800_TUB               | TUB       | Fw: CCGAGAATTGTGACTGCCTTCAAG<br>Rev: AGCATCATCTGTCTGGGATTCC   |                                                                            |                                                              |
| Prupe.4G204900_UBQ10             | UBQ10     | Fw: AAGGCTAAGATCCAAGACAAAGAG<br>Rev: CCACGAAGACGAAGCACTAAG    |                                                                            |                                                              |
| Prupe.8G137600_PPN1              | PPN1      | Fw: CCAGGAGAATCGGTGAGCAGAAAA<br>Rev: TCGAGGGTGGAGGACTTGAGAATG |                                                                            |                                                              |
