# Supplementary material for: Regulation of Fruit Growth in a Peach Slow Ripening Phenotype
Source: MDPI journal article supplement (doi:10.3390/genes12040482), 2021-03-26
Supplement: s1 [file s1]

**Table S2.** T-test (two-tailed distribution, heteroscedastic) was used to calculate statistical significance of difference in the composition of cell populations, in terms of DNA content (\* : 0.01; \*\* : 0.05; \*\*\* : 0.001).

| Fruit development stage | sampling date ( DAFB) | fruit | p-value  | significance |
|-------------------------|-----------------------|-------|----------|--------------|
| S1                      | 41                    | M1    | 5.75E-01 |              |
|                         |                       | M2    | 9.51E-02 |              |
|                         |                       | M3    | 4.89E-02 |              |
|                         |                       | M4    | 6.79E-01 |              |
|                         |                       | M5    | 3.19E-01 |              |
|                         | 48                    | M1    | 4.86E-03 | **           |
|                         |                       | M2    | 1.31E-01 |              |
|                         |                       | M3    | 6.80E-01 |              |
|                         |                       | M4    | 6.83E-01 |              |
|                         |                       | M5    | 8.23E-01 |              |
|                         | 55                    | M1    | 2.19E-01 |              |
|                         |                       | M2    | 4.03E-01 |              |
|                         |                       | M3    | 1.16E-01 |              |
|                         |                       | M4    | 2.37E-02 |              |
|                         |                       | M5    | 1.49E-01 |              |
|                         | 62                    | M1    | 5.93E-01 |              |
|                         |                       | M2    | 2.19E-01 |              |
|                         |                       | M3    | 2.39E-01 |              |
|                         |                       | M4    | 6.44E-01 |              |
|                         |                       | M5    | 9.55E-01 |              |
| S2                      | 69                    | M1    | 1.78E-01 |              |
|                         |                       | M2    | 9.14E-01 |              |
|                         |                       | M3    | 1.57E-01 |              |
|                         |                       | M4    | 1.87E-01 |              |
|                         |                       | M5    | 8.40E-01 |              |
|                         | 83                    | M1    | 8.53E-01 |              |
|                         |                       | M2    | 1.04E-01 |              |
|                         |                       | M3    | 6.64E-02 |              |
|                         |                       | M4    | 7.90E-02 |              |
|                         |                       | M5    | 6.62E-01 |              |
| S3                      | 90                    | M1    | 8.46E-01 |              |
|                         |                       | M2    | 7.23E-01 |              |
|                         |                       | M3    | 7.63E-01 |              |
|                         |                       | M4    | 5.22E-01 |              |
|                         |                       | M5    | 8.01E-01 |              |
|                         | 97                    | M1    | 3.42E-01 |              |
|                         |                       | M2    | 6.52E-01 |              |
|                         |                       | M3    | 2.50E-01 |              |
|                         |                       | M4    | 3.31E-01 |              |
|                         |                       | M5    | 3.43E-01 |              |
|                         | 104                   | M1    | 3.08E-01 |              |
|                         |                       | M2    | 2.15E-01 |              |
|                         |                       | M3    | 5.98E-01 |              |
|                         |                       | M4    | 2.74E-01 |              |
|                         |                       | M5    | 2.30E-01 |              |
|                         | 111                   | M1    | 8.89E-01 |              |
|                         |                       | M2    | 2.45E-03 | **           |
|                         |                       | M3    | 2.23E-04 | ***          |
|                         |                       | M4    | 4.46E-03 | **           |
|                         |                       | M5    | 4.35E-02 |              |
|                         | 118                   | M1    | 1.92E-01 |              |
|                         |                       | M2    | 4.11E-02 |              |
|                         |                       | M3    | 2.39E-03 | **           |
|                         |                       | M4    | 2.10E-03 | **           |
|                         |                       | M5    | 9.44E-03 | *            |
| S4                      | 125                   | M1    | 8.80E-01 |              |
|                         |                       | M2    | 7.12E-05 | ***          |
|                         |                       | M3    | 1.25E-05 | ***          |
|                         |                       | M4    | 3.42E-05 | ***          |
|                         |                       | M5    | 3.13E-03 | **           |
|                         | 132                   | M1    | 5.51E-01 |              |
|                         |                       | M2    | 2.15E-08 | ***          |
|                         |                       | M3    | 1.60E-06 | ***          |
|                         |                       | M4    | 2.41E-07 | ***          |
|                         |                       | M5    | 1.05E-03 | **           |
